# Supplementary material for: Gnidia glauca- and Plumbago zeylanica-Mediated Synthesis of Novel Copper Nanoparticles as Promising Antidiabetic Agents
Source: Hindawi journal article supplement (doi:10.1155/2019/9080279), 2019-02-11
Supplement: f1 [file 9080279.f1.pdf]

## Supplementary Information

### *Gnidia glauca* and *Plumbago zeylanica* mediated synthesis of novel copper nanoparticles as promising antidiabetic agents

Dhiraj A. Jamdade,<sup>1</sup> Dishantsingh Rajpali,<sup>1</sup> Komal A. Joshi,<sup>2</sup> Rohini Kitture,<sup>3</sup> Anuja S. Kulkarni,<sup>4</sup> Vaishali S. Shinde,<sup>4</sup> Jayesh Bellare,<sup>5</sup> Kaushik R. Babiya,<sup>6</sup> Sougata Ghosh<sup>6\*</sup>

<sup>1</sup>*Department of Microbiology, Modern College of Arts, Science and Commerce, Ganeshkhind, Pune-411016, India;*

<sup>2</sup>*Institute of Bioinformatics and Biotechnology, Savitribai Phule Pune University, Pune-411007, India;*

<sup>3</sup>*Department of Applied Physics, Defense Institute of Advanced Technology, Girinagar, Pune-411025, India;*

<sup>4</sup>*Department of Chemistry, Savitribai Phule Pune University, Pune-411007, India;*

<sup>5</sup>*Department of Chemical Engineering, Indian Institute of Technology, Bombay, Powai, Mumbai-400076, India;*

<sup>6</sup>*Department of Microbiology, School of Science, RK University, Kasturbadham, Rajkot – 360020, India.*

[directoribb@unipune.ac.in](mailto:directoribb@unipune.ac.in)

| <b>List of figures</b>                                                                                                                                                                                                                                                        | <b>Page(s)</b> |
|-------------------------------------------------------------------------------------------------------------------------------------------------------------------------------------------------------------------------------------------------------------------------------|----------------|
| FIGURE S1: FESEM micrographs of CuNPs synthesized by plant extracts using $10^{-3}$ M aqueous $\text{CuSO}_4 \cdot 5\text{H}_2\text{O}$ solution in the dark at $100^\circ\text{C}$ . A) GGFE; B) GGLE; C) GGSE and D) PZLE.                                                  | S2             |
| FIGURE S2: Representative X-ray diffraction profile of CuNPs synthesized by plant extracts using $10^{-3}$ M aqueous $\text{CuSO}_4 \cdot 5\text{H}_2\text{O}$ solution in the dark at $100^\circ\text{C}$ . (Inset represent the extracts with which CuNPs are synthesized). | S3             |

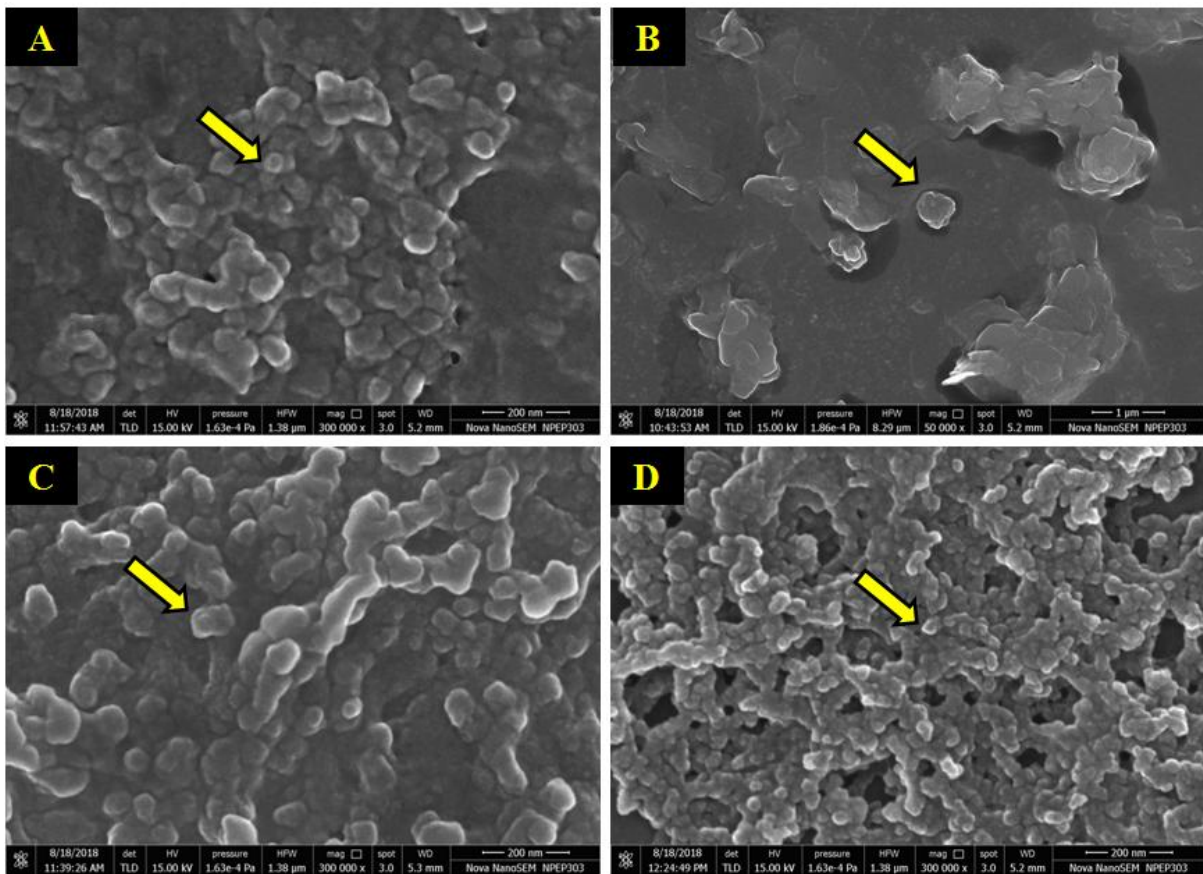

FIGURE S1: FESEM micrographs of CuNPs synthesized by plant extracts using  $10^{-3}$  M aqueous  $\text{CuSO}_4 \cdot 5\text{H}_2\text{O}$  solution in the dark at  $100^\circ\text{C}$ . A) GGFE; B) GGLE; C) GGSE and D) PZLE.

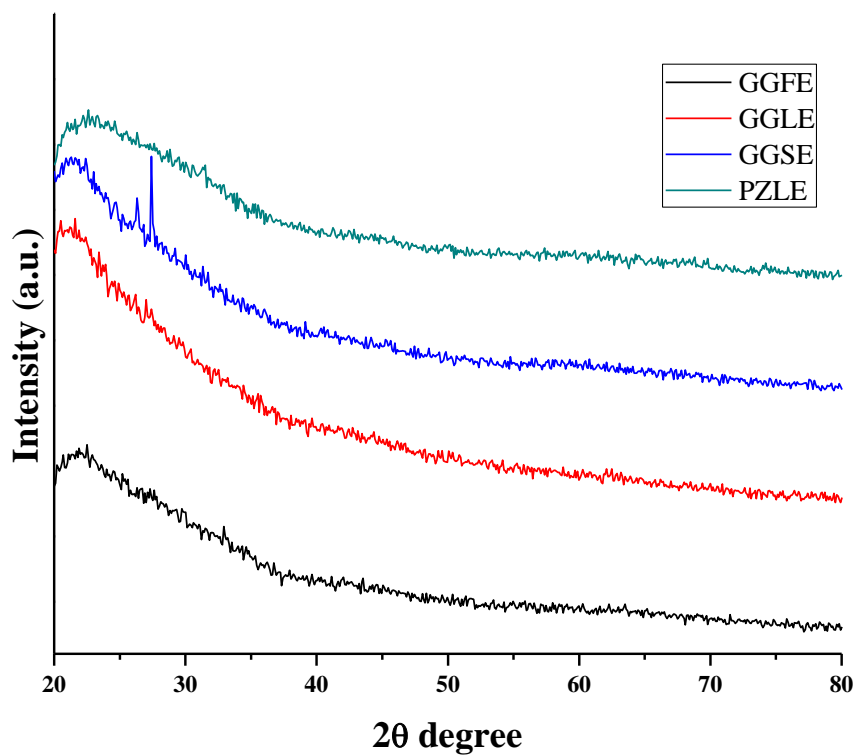

FIGURE S2: Representative X-ray diffraction profile of CuNPs synthesized by plant extracts using  $10^{-3}$  M aqueous  $\text{CuSO}_4 \cdot 5\text{H}_2\text{O}$  solution in the dark at  $100^\circ\text{C}$ . (Inset represents the extracts with which CuNPs are synthesized).
